# Supplementary material
Source: Springer Nature journal article supplement (https://www.springermedizin.de/resource/supplementary/12874_2008_345_MOESM1_ESM.pdf/9434274)

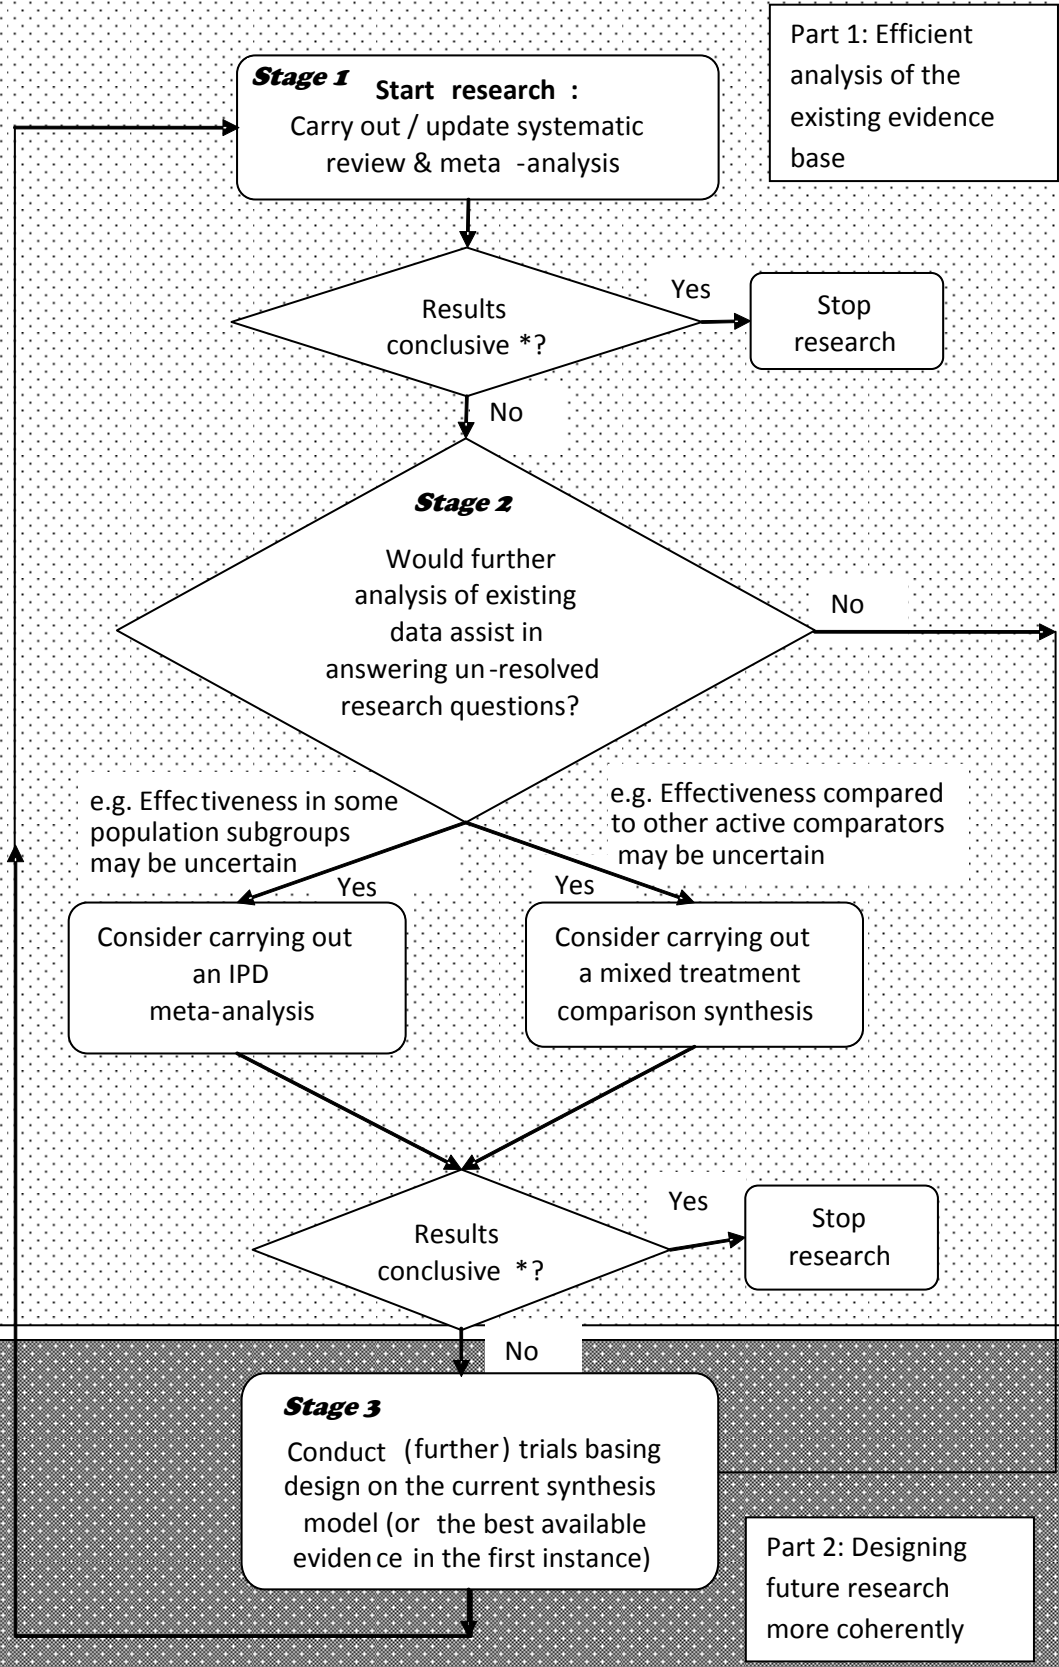

Supplement: MOESM1 [file 9434274]
